# Supplementary material for: Metabolomic Abnormalities in Serum from Untreated and Treated Dogs with Hyper- and Hypoadrenocorticism
Source: MDPI journal article supplement (doi:10.3390/metabo12040339), 2022-04-09
Supplement: s1 [file s1]

# Metabolomic Abnormalities in Serum from Untreated and Treated Dogs with Hyper- and Hypoadrenocorticism

Carolin Anna Imbery <sup>1,2</sup>, Frank Dieterle <sup>3,†</sup>, Claudia Ottka <sup>4,5,6,†</sup>, Corinna Weber <sup>2</sup>, Götz Schlotterbeck <sup>3</sup>, Elisabeth Müller <sup>2</sup>, Hannes Lohi <sup>4,5,6</sup> and Urs Giger <sup>1,7,\*</sup>

<sup>1</sup> Vetsuisse Faculty, University of Zürich, 8057 Zürich, Switzerland; carolinanna.imbery@uzh.ch

<sup>2</sup> Laboklin GmbH & Co. KG, 97688 Bayern, Germany; weber@laboklin.com (C.W.); mueller@laboklin.com (E.M.)

<sup>3</sup> Institute for Chemistry and Bioanalytics, School of Life Sciences, University of Applied Sciences Northwestern Switzerland, 4132 Muttenz, Switzerland; fd@frank-dieterle.de (F.D.); goetz.schlotterbeck@fhnw.ch (G.S.)

<sup>4</sup> PetMeta Labs Oy, 00300 Helsinki, Finland; claudia.ottka@petmetalabs.com (C.O.); hannes.lohi@petmetalabs.com (H.L.)

<sup>5</sup> Department of Veterinary Biosciences and Department of Medical and Clinical Genetics, University of Helsinki, 00100 Helsinki, Finland

<sup>6</sup> Folkhälsan Research Center, 00250 Helsinki, Finland

<sup>7</sup> Section of Medical Genetics, University of Pennsylvania, Philadelphia, PA 19104, USA

\* Correspondence: giger@upenn.edu

† These authors contributed equally to this work

**Supplementary Table S1** Metabolomic serum parameters differing between dogs in the groups of CONT (n=40), HYPER<sub>U</sub> (n=27), HYPER<sub>T</sub> (n=28), HYPO<sub>U</sub> (n=35), and HYPO<sub>T</sub> (n=23).

| Parameter                          | Reference interval* | CONT <sup>‡</sup>             | HYPER <sub>U</sub> <sup>‡</sup> | HYPER <sub>T</sub> <sup>‡</sup> | HYPO <sub>U</sub> <sup>‡</sup> | <i>p</i> value <sup>‡</sup> | HYPO <sub>U</sub> <sup>§</sup> | HYPO <sub>T</sub> <sup>§</sup> | <i>p</i> value <sup>§</sup> |
|------------------------------------|---------------------|-------------------------------|---------------------------------|---------------------------------|--------------------------------|-----------------------------|--------------------------------|--------------------------------|-----------------------------|
| <b>Amino acids, median (range)</b> |                     |                               |                                 |                                 |                                |                             |                                |                                |                             |
| Phenylalanine                      | 0.03-0.07 mmol/L    | 0.04 (0.03-0.06) <sup>a</sup> | 0.07 (0.04-0.09) <sup>b</sup>   | 0.06 (0.04-0.09) <sup>b</sup>   | 0.07 (0.04-0.14) <sup>b</sup>  | <.001                       | 0.08 (0.05-0.14)               | 0.04 (0.02-0.06)               | <.001                       |
| Tyrosine                           | 0.04-0.09 mmol/L    | 0.06 (0.04-0.09) <sup>a</sup> | 0.08 (0.06-0.12) <sup>b</sup>   | 0.06 (0.04-0.11) <sup>a</sup>   | 0.07 (0.04-0.09) <sup>a</sup>  | <.01                        | 0.07 (0.04-0.09)               | 0.06 (0.05-0.08)               | >.05                        |
| Histidine                          | 0.05-0.10 mmol/L    | 0.07 (0.04-0.09) <sup>a</sup> | 0.07 (0.05-0.11) <sup>ac</sup>  | 0.08 (0.06-0.12) <sup>bc</sup>  | 0.09 (0.05-0.16) <sup>b</sup>  | <.001                       | 0.09 (0.06-0.16)               | 0.07 (0.05-0.10)               | <.001                       |
| Glutamine                          | 0.64-1.02 mmol/L    | 0.67 (0.53-0.97)              | 0.60 (0.38-0.76)                | 0.59 (0.44-0.77)                | 0.64 (0.47-0.85)               | >.05                        | 0.64 (0.47-0.85)               | 0.72 (0.39-0.83)               | >.05                        |
| Total BCAA                         | 0.24-0.52 mmol/L    | 0.38 (0.25-0.54) <sup>a</sup> | 0.49 (0.29-1.89) <sup>b</sup>   | 0.40 (0.26-0.80) <sup>ab</sup>  | 0.44 (0.27-0.85) <sup>a</sup>  | <.01                        | 0.44 (0.27-0.59)               | 0.37 (0.26-0.81)               | >.05                        |
| Leucine                            | 0.08-0.19 mmol/L    | 0.13 (0.07-0.18)              | 0.16 (0.08-0.72)                | 0.13 (0.08-0.24)                | 0.15 (0.09-0.31)               | >.05                        | 0.14 (0.09-0.22)               | 0.13 (0.07-0.27)               | >.05                        |
| Isoleucine                         | 0.04-0.09 mmol/L    | 0.07 (0.05-0.10) <sup>a</sup> | 0.09 (0.04-0.16) <sup>b</sup>   | 0.07 (0.05-0.15) <sup>ab</sup>  | 0.08 (0.04-0.14) <sup>ab</sup> | <.01                        | 0.07 (0.04-0.12)               | 0.06 (0.05-0.13)               | >.05                        |
| Valine                             | 0.11-0.25 mmol/L    | 0.19 (0.12-0.26) <sup>a</sup> | 0.25 (0.17-1.09) <sup>b</sup>   | 0.20 (0.14-0.41) <sup>a</sup>   | 0.21 (0.11-0.45) <sup>a</sup>  | <.001                       | 0.20 (0.11-0.28)               | 0.19 (0.12-0.42)               | >.05                        |
| Alanine                            | 0.22-0.60 mmol/L    | 0.27 (0.19-0.45) <sup>a</sup> | 0.44 (0.33-0.74) <sup>b</sup>   | 0.31 (0.15-0.48) <sup>a</sup>   | 0.28 (0.13-0.94) <sup>a</sup>  | <.001                       | 0.27 (0.13-0.94)               | 0.34 (0.20-0.59)               | >.05                        |
| Glycine                            | 0.13-0.45 mmol/L    | 0.40 (0.11-0.62)              | 0.37 (0.05-1.09)                | 0.37 (0.03-0.50)                | 0.37 (0.22-0.82)               | >.05                        | 0.36 (0.22-0.82)               | 0.36 (0.22-0.70)               | >.05                        |
| Alanine/BCAA                       | 0.6-1.6             | 0.7 (0.5-1.2) <sup>ab</sup>   | 0.9 (0.2-1.2) <sup>b</sup>      | 0.7 (0.4-1.3) <sup>ac</sup>     | 0.6 (0.2-1.7) <sup>a</sup>     | <.05                        | 0.6 (0.2-1.7)                  | 0.9 (0.3-1.5)                  | >.05                        |
| Alanine/Valine                     | 1.2-3.5             | 1.5 (1.0-2.8)                 | 1.8 (0.3-2.5)                   | 1.3 (0.9-2.7)                   | 1.3 (0.5-3.3)                  | >.05                        | 1.3 (0.5-3.3)                  | 1.8 (0.7-2.9)                  | >.05                        |
| BCAA/Tyrosine                      | 3.8-9.2             | 5.9 (3.8-8.7)                 | 6.2 (4.7-24.6)                  | 6.6 (4.2-10.9)                  | 6.4 (3.8-13.1)                 | >.05                        | 6.1 (3.8-9.8)                  | 6.2 (4.1-9.9)                  | >.05                        |
| Phenylalanine/Tyrosine             | 0.5-1.0             | 0.7 (0.5-1.0) <sup>a</sup>    | 0.8 (0.6-1.0) <sup>ac</sup>     | 0.9 (0.5-1.4) <sup>c</sup>      | 1.0 (0.7-2.3) <sup>b</sup>     | <.001                       | 1.0 (0.8-2.3)                  | 0.7 (0.4-1.0)                  | <.001                       |
| Glycine/Valine                     | 0.7-3.0             | 2.1 (0.8-3.7) <sup>a</sup>    | 1.5 (0.2-2.4) <sup>c</sup>      | 1.6 (0.1-3.2) <sup>bc</sup>     | 1.7 (1.0-4.5) <sup>ab</sup>    | <.01                        | 1.7 (1.1-4.5)                  | 1.9 (1.2-3.3)                  | >.05                        |
| Glycine/BCAA                       | 0.3-1.5             | 1.1 (0.3-1.8) <sup>a</sup>    | 0.7 (0.1-1.3) <sup>b</sup>      | 0.8 (0.1-1.6) <sup>ab</sup>     | 0.8 (0.5-1.9) <sup>ab</sup>    | <.05                        | 0.8 (0.5-1.9)                  | 0.9 (0.6-1.6)                  | >.05                        |
| <b>Fatty acids, median (range)</b> |                     |                               |                                 |                                 |                                |                             |                                |                                |                             |
| Total fatty acids                  | 9.7-21.0 mmol/L     | 15.0 (10.2-20.3) <sup>a</sup> | 23.8 (11.8-35.9) <sup>c</sup>   | 17.6 (10.8-27.7) <sup>ac</sup>  | 11.6 (6.7-24.2) <sup>b</sup>   | <.001                       | 11.7 (6.7-24.2)                | 18.2 (9.5-29.8)                | <.05                        |
| Polyunsaturated fatty acids        | 4.7-11.1 mmol/L     | 7.7 (5.0-11.1) <sup>a</sup>   | 12.0 (5.7-18.4) <sup>c</sup>    | 8.5 (5.2-12.6) <sup>ac</sup>    | 5.8 (3.5-10.9) <sup>b</sup>    | <.001                       | 5.8 (3.5-10.9)                 | 8.5 (4.8-14.3)                 | <.05                        |
| Omega-6 fatty acids                | 4.1-9.8 mmol/L      | 7.0 (4.5-9.7) <sup>a</sup>    | 11.1 (5.2-16.3) <sup>c</sup>    | 7.7 (4.7-11.6) <sup>a</sup>     | 5.3 (3.0-9.7) <sup>b</sup>     | <.001                       | 5.3 (3.0-9.7)                  | 7.6 (4.4-13.3)                 | <.01                        |
| Arachidonic acid                   | 1.4-3.6 mmol/L      | 2.4 (1.5-4.0) <sup>a</sup>    | 4.1 (1.5-5.8) <sup>c</sup>      | 2.8 (1.4-4.1) <sup>a</sup>      | 1.9 (0.8-3.5) <sup>b</sup>     | <.001                       | 1.8 (0.8-2.9)                  | 2.7 (1.4-4.3)                  | >.05                        |
| Linoleic acid                      | 2.5-5.9 mmol/L      | 4.2 (2.7-5.8) <sup>a</sup>    | 6.7 (3.4-10.1) <sup>c</sup>     | 4.8 (3.1-7.5) <sup>ac</sup>     | 2.9 (0.1-6.4) <sup>b</sup>     | <.001                       | 2.9 (0.1-6.4)                  | 5.1 (2.4-8.7)                  | <.001                       |
| Omega-3 fatty acids                | 0.4-1.6 mmol/L      | 0.8 (0.3-1.4)                 | 0.7 (0.2-2.1)                   | 0.8 (0.4-1.4)                   | 0.6 (0.3-1.2)                  | >.05                        | 0.6 (0.3-1.2)                  | 0.8 (0.3-1.3)                  | >.05                        |
| Docosapentaenoic acid              | 0.1-0.4 mmol/L      | 0.2 (0.1-0.4) <sup>a</sup>    | 0.3 (0.1-0.6) <sup>a</sup>      | 0.2 (0.1-0.3) <sup>a</sup>      | 0.1 (0.0-0.3) <sup>b</sup>     | <.001                       | 0.1 (0.0-0.3)                  | 0.2 (0.0-0.3)                  | >.05                        |
| Docosahexaenoic acid               | 0.1-0.7 mmol/L      | 0.2 (0.0-0.6)                 | 0.3 (0.0-0.5)                   | 0.3 (0.1-0.6)                   | 0.3 (0.1-0.5)                  | >.05                        | 0.3 (0.1-0.5)                  | 0.2 (0.0-0.4)                  | >.05                        |
| Oleic acid                         | 1.3-2.8 mmol/L      | 2.0 (1.3-2.9) <sup>a</sup>    | 2.9 (1.6-5.0) <sup>c</sup>      | 2.4 (1.4-4.5) <sup>c</sup>      | 1.3 (0.7-4.1) <sup>b</sup>     | <.001                       | 1.4 (0.7-4.1)                  | 2.5 (1.0-5.1)                  | <.01                        |

| Parameter                                             | Reference interval* | CONT‡                          | HYPER <sub>U</sub> ‡           | HYPER <sub>T</sub> ‡           | HYPO <sub>U</sub> ‡            | <i>p</i> value‡ | HYPO <sub>U</sub> § | HYPO <sub>T</sub> § | <i>p</i> value§ |
|-------------------------------------------------------|---------------------|--------------------------------|--------------------------------|--------------------------------|--------------------------------|-----------------|---------------------|---------------------|-----------------|
| <b>Fatty acids, median (range)</b>                    |                     |                                |                                |                                |                                |                 |                     |                     |                 |
| Saturated fatty acids                                 | 3.6-7.4 mmol/L      | 5.5 (3.9-7.1) <sup>a</sup>     | 9.0 (4.5-12.6) <sup>c</sup>    | 6.6 (4.2-10.6) <sup>c</sup>    | 4.5 (2.6-9.1) <sup>b</sup>     | <.001           | 4.6 (2.6-9.1)       | 6.8 (3.6-10.9)      | <.01            |
| Stearic acid                                          | 1.7-3.8 mmol/L      | 2.7 (1.8-3.6) <sup>a</sup>     | 4.5 (2.1-6.2) <sup>c</sup>     | 3.2 (1.9-5.0) <sup>c</sup>     | 2.1 (1.2-4.1) <sup>b</sup>     | <.001           | 2.1 (1.2-4.1)       | 3.4 (1.7-5.4)       | <.01            |
| Palmitic acid                                         | 1.8-3.6 mmol/L      | 2.8 (2.0-3.5) <sup>a</sup>     | 4.3 (2.4-6.4) <sup>c</sup>     | 3.5 (2.3-5.6) <sup>c</sup>     | 2.3 (1.4-5.0) <sup>b</sup>     | <.001           | 2.3 (1.4-5.0)       | 3.4 (1.9-5.7)       | <.01            |
| Polyunsaturated fatty acids % of total fatty acids    | 47.5-54.9%          | 51.2 (47.1-55.5)               | 51.2 (44.0-54.7)               | 49.3 (39.2-52.4)               | 50.6 (45.1-55.3)               | >.05            | 50.6 (45.1-53.3)    | 49.0 (42.2-52.2)    | >.05            |
| Omega-6 fatty acids % of total fatty acids            | 41.6-47.5%          | 45.5 (41.6-49.7) <sup>ac</sup> | 47.4 (41.2-50.8) <sup>c</sup>  | 44.9 (32.6-47.7) <sup>ab</sup> | 44.9 (38.1-50.3) <sup>ab</sup> | <.05            | 45.0 (38.1-47.8)    | 44.8 (38.5-47.5)    | >.05            |
| Arachidonic acid % of total fatty acids               | 13.2-20.1%          | 16.4 (10.9-23.9)               | 17.5 (10.3-23.2)               | 15.2 (8.5-18.9)                | 17.0 (10.3-22.7)               | >.05            | 16.6 (10.3-22.7)    | 13.9 (10.1-20.1)    | >.05            |
| Linoleic acid % of total fatty acids                  | 24.1-28.6%          | 27.7 (24.8-30.4) <sup>a</sup>  | 28.0 (24.3-31.6) <sup>a</sup>  | 27.3 (21.7-30.1) <sup>a</sup>  | 25.9 (1.3-28.5) <sup>b</sup>   | <.001           | 25.5 (1.3-27.6)     | 27.9 (24.6-30.2)    | <.05            |
| Omega-3 fatty acids % of total fatty acids            | 3.4-10.4%           | 5.4 (2.1-8.6) <sup>a</sup>     | 3.3 (1.1-6.6) <sup>b</sup>     | 4.4 (2.7-7.2) <sup>ab</sup>    | 5.8 (3.3-9.9) <sup>a</sup>     | <.01            | 6.1 (3.3-9.9)       | 4.7 (2.0-7.3)       | <.05            |
| Docosapentaenoic acid % of total fatty acids          | 1.1-2.0%            | 1.4 (0.8-2.1)                  | 1.2 (0.6-1.8)                  | 1.2 (0.6-1.7)                  | 1.1 (0.0-1.8)                  | >.05            | 1.2 (0.0-1.8)       | 1.0 (0.3-1.5)       | >.05            |
| Docosahexaenoic acid % of total fatty acids           | 0.7-4.8%            | 1.7 (0.1-3.5) <sup>a</sup>     | 1.2 (0.0-2.1) <sup>c</sup>     | 1.7 (0.5-2.5) <sup>ac</sup>    | 2.3 (0.7-4.5) <sup>b</sup>     | <.001           | 2.3 (1.1-4.5)       | 1.2 (0.0-2.3)       | <.001           |
| Saturated fatty acids % of total fatty acids          | 33.8-37.9%          | 36.3 (34.6-38.5) <sup>a</sup>  | 36.9 (34.0-39.8) <sup>ac</sup> | 37.5 (36.1-40.6) <sup>c</sup>  | 38.0 (34.7-42.0) <sup>b</sup>  | <.001           | 37.9 (34.7-42.0)    | 37.7 (35.4-39.9)    | >.05            |
| Oleic acid % of total fatty acids                     | 10.7-15.1%          | 12.5 (8.9-15.7) <sup>a</sup>   | 12.4 (9.9-16.2) <sup>ab</sup>  | 13.6 (11.1-20.2) <sup>ac</sup> | 11.4 (7.8-17.1) <sup>b</sup>   | <.05            | 11.4 (9.2-17.1)     | 13.7 (10.5-18.9)    | >.05            |
| Stearic acid % of total fatty acids                   | 17.3-19.4%          | 18.0 (16.1-18.9)               | 18.6 (17.3-19.8)               | 18.1 (17.1-18.9)               | 18.3 (15.8-20.4)               | >.05            | 18.2 (15.8-20.3)    | 18.3 (17.0-19.3)    | >.05            |
| Palmitic acid % of total fatty acids                  | 15.9-19.5%          | 18.5 (16.7-19.9) <sup>a</sup>  | 18.0 (16.5-20.6) <sup>a</sup>  | 19.1 (18.0-23.3) <sup>b</sup>  | 19.7 (16.5-22.8) <sup>b</sup>  | <.001           | 19.6 (17.1-22.8)    | 19.6 (17.3-21.4)    | >.05            |
| Omega-6/Omega-3 fatty acids                           | 4.2-13.4            | 8.7 (5.3-22.7) <sup>a</sup>    | 14.5 (6.9-42.8) <sup>b</sup>   | 10.4 (4.9-15.7) <sup>a</sup>   | 7.5 (3.8-14.6) <sup>a</sup>    | <.01            | 7.5 (3.8-14.6)      | 9.6 (5.7-22.8)      | >.05            |
| <b>Glycolysis related metabolites, median (range)</b> |                     |                                |                                |                                |                                |                 |                     |                     |                 |
| Glucose                                               | 4.4-6.8 mmol/L      | 4.8 (3.5-5.7)                  | 5.4 (2.5-22.4)                 | 4.5 (0.9-6.3)                  | 4.4 (2.4-14.2)                 | >.05            | 4.4 (2.4-14.2)      | 4.7 (3.9-6.9)       | >.05            |
| Lactate                                               | 1.1-3.6 mmol/L      | 1.6 (0.8-4.2) <sup>a</sup>     | 3.7 (2.2-14.4) <sup>b</sup>    | 2.0 (1.1-5.4) <sup>a</sup>     | 2.0 (0.7-3.9) <sup>a</sup>     | <.001           | 2.0 (1.0-3.9)       | 1.9 (1.0-5.8)       | >.05            |
| Pyruvate                                              | 0.01-0.11 mmol/L    | 0.04 (0.02-0.10) <sup>a</sup>  | 0.07 (0.03-0.21) <sup>b</sup>  | 0.04 (0.02-0.10) <sup>a</sup>  | 0.04 (0.01-0.14) <sup>a</sup>  | <.01            | 0.03 (0.01-0.14)    | 0.05 (0.02-0.18)    | >.05            |
| Acetate                                               | 0.02-0.04 mmol/L    | 0.02 (0.02-0.04) <sup>a</sup>  | 0.04 (0.03-0.08) <sup>c</sup>  | 0.03 (0.02-0.09) <sup>bc</sup> | 0.03 (0.02-0.08) <sup>b</sup>  | <.001           | 0.03 (0.02-0.07)    | 0.02 (0.01-0.03)    | >.05            |
| Citrate                                               | 0.06-0.12 mmol/L    | 0.07 (0.05-0.09) <sup>a</sup>  | 0.08 (0.05-0.13) <sup>b</sup>  | 0.07 (0.06-0.12) <sup>ab</sup> | 0.08 (0.05-0.43) <sup>b</sup>  | <.05            | 0.09 (0.06-0.43)    | 0.09 (0.06-0.14)    | >.05            |
| <b>Inflammation marker, median (range)</b>            |                     |                                |                                |                                |                                |                 |                     |                     |                 |
| GlycA                                                 | 0.60-1.03 mmol/L    | 0.66 (0.50-0.99) <sup>a</sup>  | 1.33 (0.74-2.28) <sup>c</sup>  | 1.08 (0.66-1.48) <sup>bc</sup> | 0.82 (0.53-2.23) <sup>b</sup>  | <.001           | 0.82 (0.53-2.23)    | 1.13 (0.71-1.85)    | >.05            |

| Parameter                                             | Reference interval* | CONT <sup>‡</sup>             | HYPER <sub>U</sub> <sup>‡</sup> | HYPER <sub>T</sub> <sup>‡</sup> | HYPO <sub>U</sub> <sup>‡</sup> | <i>p</i> value <sup>‡</sup> | HYPO <sub>U</sub> <sup>‡</sup> | HYPO <sub>T</sub> <sup>‡</sup> | <i>p</i> value <sup>‡</sup> |
|-------------------------------------------------------|---------------------|-------------------------------|---------------------------------|---------------------------------|--------------------------------|-----------------------------|--------------------------------|--------------------------------|-----------------------------|
| <b>Fluid balance</b> , median (range)                 |                     |                               |                                 |                                 |                                |                             |                                |                                |                             |
| Albumin                                               | 25-32 g/L           | 28 (24-31) <sup>ac</sup>      | 30 (23-34) <sup>c</sup>         | 27 (22-30) <sup>ab</sup>        | 25 (20-33) <sup>ab</sup>       | <.05                        | 25 (20-33)                     | 30 (22-35)                     | <.05                        |
| Creatinine                                            | 32-103 µmol/L       | 60 (25-76) <sup>ab</sup>      | 46 (12-77) <sup>c</sup>         | 58 (24-164) <sup>ac</sup>       | 76 (25-366) <sup>b</sup>       | <.001                       | 62 (27-366)                    | 60 (22-98)                     | >.05                        |
| <b>Triglycerides</b> , median (range)                 |                     |                               |                                 |                                 |                                |                             |                                |                                |                             |
| Total triglycerides                                   | 0.19-1.00 mmol/L    | 0.38 (0.05-0.87) <sup>a</sup> | 0.82 (0.30-2.61) <sup>b</sup>   | 0.71 (0.22-1.58) <sup>b</sup>   | 0.35 (0.07-3.72) <sup>a</sup>  | <.001                       | 0.38 (0.07-3.72)               | 0.67 (0.20-2.26)               | >.05                        |
| VLDL triglycerides                                    | 0.00-0.70 mmol/L    | 0.12 (0.00-0.53) <sup>a</sup> | 0.59 (0.12-2.14) <sup>b</sup>   | 0.46 (0.04-1.24) <sup>b</sup>   | 0.12 (0.00-2.98) <sup>a</sup>  | <.001                       | 0.13 (0.01-2.98)               | 0.42 (0.05-1.68)               | >.05                        |
| LDL triglycerides                                     | 0.13-0.31 mmol/L    | 0.22 (0.04-0.34)              | 0.20 (0.00-0.38)                | 0.23 (0.06-0.36)                | 0.19 (0.03-0.51)               | >.05                        | 0.18 (0.03-0.51)               | 0.23 (0.10-0.41)               | >.05                        |
| HDL triglycerides                                     | 0.00-0.08 mmol/L    | 0.03 (0.01-0.08) <sup>a</sup> | 0.08 (0.03-0.15) <sup>b</sup>   | 0.07 (0.02-0.15) <sup>b</sup>   | 0.03 (0.00-0.23) <sup>a</sup>  | <.001                       | 0.03 (0.00-0.23)               | 0.07 (0.01-0.17)               | >.05                        |
| <b>Cholesterol</b> , median (range)                   |                     |                               |                                 |                                 |                                |                             |                                |                                |                             |
| Total cholesterol                                     | 3.6-10.3 mmol/L     | 6.4 (3.8-10.0) <sup>a</sup>   | 10.1 (4.2-17.0) <sup>c</sup>    | 6.8 (3.9-11.4) <sup>a</sup>     | 4.2 (2.2-8.5) <sup>b</sup>     | <.001                       | 3.9 (2.2-6.6)                  | 6.5 (3.4-13.2)                 | <.01                        |
| Esterified cholesterol                                | 2.9-8.1 mmol/L      | 5.2 (3.2-8.0) <sup>a</sup>    | 7.9 (3.4-13.2) <sup>c</sup>     | 5.4 (3.2-8.8) <sup>a</sup>      | 3.3 (1.9-6.9) <sup>b</sup>     | <.001                       | 3.3 (1.9-5.2)                  | 5.3 (2.9-10.4)                 | <.01                        |
| Free cholesterol                                      | 0.6-2.2 mmol/L      | 1.2 (0.6-2.1) <sup>a</sup>    | 2.1 (0.8-3.8) <sup>c</sup>      | 1.4 (0.7-2.6) <sup>a</sup>      | 0.8 (0.4-1.7) <sup>b</sup>     | <.001                       | 0.8 (0.4-1.4)                  | 1.3 (0.5-2.9)                  | <.01                        |
| VLDL cholesterol                                      | 0.0-0.3 mmol/L      | 0.1 (0.0-0.4) <sup>a</sup>    | 0.4 (0.1-1.9) <sup>b</sup>      | 0.3 (0.1-0.5) <sup>b</sup>      | 0.1 (0.1-0.8) <sup>a</sup>     | <.001                       | 0.1 (0.1-0.8)                  | 0.2 (0.1-0.9)                  | >.05                        |
| LDL cholesterol                                       | 0.3-2.3 mmol/L      | 1.0 (0.3-2.8) <sup>a</sup>    | 2.5 (0.5-7.5) <sup>c</sup>      | 1.2 (0.2-4.0) <sup>a</sup>      | 0.6 (0.2-2.0) <sup>b</sup>     | <.001                       | 0.6 (0.4-1.9)                  | 1.0 (0.4-4.4)                  | >.05                        |
| HDL cholesterol                                       | 3.2-7.9 mmol/L      | 5.3 (3.5-7.4) <sup>a</sup>    | 7.2 (3.7-9.8) <sup>c</sup>      | 5.5 (3.2-7.7) <sup>a</sup>      | 3.6 (1.8-6.3) <sup>b</sup>     | <.001                       | 3.3 (1.8-5.1)                  | 5.3 (3.0-9.8)                  | <.01                        |
| <b>Total lipids</b> , median (range)                  |                     |                               |                                 |                                 |                                |                             |                                |                                |                             |
| VLDL lipids                                           | 0.1-1.2 mmol/L      | 0.3 (0.1-1.0) <sup>a</sup>    | 1.3 (0.4-5.0) <sup>b</sup>      | 0.9 (0.2-2.3) <sup>b</sup>      | 0.3 (0.1-4.6) <sup>a</sup>     | <.001                       | 0.3 (0.1-4.6)                  | 0.8 (0.2-3.0)                  | >.05                        |
| LDL lipids                                            | 0.7-3.7 mmol/L      | 1.8 (0.7-4.4) <sup>a</sup>    | 4.2 (1.2-11.4) <sup>c</sup>     | 2.1 (0.8-6.1) <sup>a</sup>      | 1.0 (0.6-3.3) <sup>b</sup>     | <.001                       | 1.0 (0.6-3.1)                  | 1.8 (0.7-6.8)                  | >.05                        |
| HDL lipids                                            | 6.9-15.1 mmol/L     | 10.9 (7.5-14.4) <sup>a</sup>  | 15.0 (8.2-18.7) <sup>c</sup>    | 11.6 (7.1-15.6) <sup>a</sup>    | 7.7 (4.4-12.8) <sup>b</sup>    | <.001                       | 7.5 (4.4-10.8)                 | 11.2 (6.8-18.5)                | <.001                       |
| <b>Particle concentrations</b> , median (range)       |                     |                               |                                 |                                 |                                |                             |                                |                                |                             |
| VLDL particles                                        | 0.01-0.05 µmol/L    | 0.03 (0.01-0.06) <sup>a</sup> | 0.08 (0.02-0.26) <sup>b</sup>   | 0.05 (0.02-0.10) <sup>b</sup>   | 0.03 (0.02-0.14) <sup>a</sup>  | <.001                       | 0.03 (0.02-0.14)               | 0.05 (0.02-0.14)               | >.05                        |
| LDL particles                                         | 0.24-1.30 µmol/L    | 0.65 (0.26-1.66) <sup>a</sup> | 1.52 (0.38-4.12) <sup>c</sup>   | 0.77 (0.27-2.32) <sup>a</sup>   | 0.37 (0.21-1.19) <sup>b</sup>  | <.001                       | 0.39 (0.25-1.12)               | 0.68 (0.28-2.41)               | >.05                        |
| HDL particles                                         | 0.03-0.06 mmol/L    | 0.04 (0.03-0.05) <sup>a</sup> | 0.05 (0.02-0.06) <sup>c</sup>   | 0.04 (0.03-0.05) <sup>a</sup>   | 0.03 (0.01-0.05) <sup>b</sup>  | <.001                       | 0.03 (0.01-0.04)               | 0.04 (0.03-0.06)               | <.01                        |
| <b>Average diameter of particles</b> , median (range) |                     |                               |                                 |                                 |                                |                             |                                |                                |                             |
| VLDL size                                             | 35.2-43.8 nm        | 38.1 (35.0-43.1) <sup>a</sup> | 39.7 (37.9-46.6) <sup>bc</sup>  | 40.9 (35.4-45.0) <sup>c</sup>   | 38.7 (35.2-45.3) <sup>ab</sup> | <.01                        | 39.4 (35.2-45.3)               | 40.2 (36.6-45.6)               | >.05                        |
| LDL size                                              | 22.2-23.5 nm        | 22.6 (22.2-23.5) <sup>a</sup> | 22.7 (22.3-23.4) <sup>a</sup>   | 22.6 (22.3-23.5) <sup>a</sup>   | 23.2 (22.1-23.9) <sup>b</sup>  | <.001                       | 23.2 (22.4-23.9)               | 22.7 (22.1-23.7)               | <.05                        |
| HDL size                                              | 10.1-10.7 nm        | 10.6 (10.2-11.0) <sup>a</sup> | 10.7 (10.2-11.3) <sup>a</sup>   | 10.6 (10.3-11.3) <sup>a</sup>   | 10.3 (10.1-11.2) <sup>b</sup>  | <.01                        | 10.3 (10.1-11.2)               | 10.6 (10.1-11.0)               | >.05                        |

| Parameter                                     | Reference interval* | CONT <sup>‡</sup>              | HYPER <sub>U</sub> <sup>‡</sup> | HYPER <sub>T</sub> <sup>‡</sup> | HYPO <sub>U</sub> <sup>‡</sup> | <i>p</i> value <sup>‡</sup> | HYPO <sub>U</sub> <sup>§</sup> | HYPO <sub>T</sub> <sup>§</sup> | <i>p</i> value <sup>§</sup> |
|-----------------------------------------------|---------------------|--------------------------------|---------------------------------|---------------------------------|--------------------------------|-----------------------------|--------------------------------|--------------------------------|-----------------------------|
| <b>Lipoprotein subclasses, median (range)</b> |                     |                                |                                 |                                 |                                |                             |                                |                                |                             |
| L-HDL cholesterol                             | 2.3-4.4 mmol/L      | 3.1 (2.2-3.8) <sup>a</sup>     | 3.7 (1.9-4.7) <sup>a</sup>      | 3.2 (2.1-4.0) <sup>a</sup>      | 2.3 (1.3-3.8) <sup>b</sup>     | <.001                       | 2.1 (1.3-3.3)                  | 3.2 (2.2-4.4)                  | <.01                        |
| L-HDL esterified cholesterol                  | 2.0-3.8 mmol/L      | 2.7 (1.9-3.3) <sup>a</sup>     | 3.1 (1.5-4.0) <sup>a</sup>      | 2.7 (1.8-3.3) <sup>a</sup>      | 2.0 (1.1-3.3) <sup>b</sup>     | <.001                       | 1.8 (1.1-2.9)                  | 2.7 (1.9-3.7)                  | <.01                        |
| L-HDL free cholesterol                        | 0.3-0.6 mmol/L      | 0.4 (0.3-0.6) <sup>a</sup>     | 0.6 (0.3-0.7) <sup>c</sup>      | 0.5 (0.3-0.7) <sup>a</sup>      | 0.3 (0.2-0.5) <sup>b</sup>     | <.001                       | 0.3 (0.2-0.4)                  | 0.4 (0.3-0.7)                  | <.01                        |
| L-HDL lipids                                  | 5.0-8.3 mmol/L      | 6.1 (4.7-7.5) <sup>a</sup>     | 7.6 (4.1-9.6) <sup>c</sup>      | 6.5 (4.4-8.2) <sup>ac</sup>     | 4.9 (3.0-7.5) <sup>b</sup>     | <.001                       | 4.4 (3.0-6.9)                  | 6.7 (4.6-8.1)                  | <.01                        |
| L-HDL particles                               | 0.02-0.03 mmol/L    | 0.02 (0.02-0.03) <sup>a</sup>  | 0.03 (0.01-0.04) <sup>ac</sup>  | 0.02 (0.02-0.03) <sup>a</sup>   | 0.02 (0.01-0.03) <sup>b</sup>  | <.001                       | 0.02 (0.01-0.03)               | 0.02 (0.02-0.03)               | <.01                        |
| L-HDL phospholipids                           | 2.48-3.94 mmol/L    | 3.08 (2.42-3.74) <sup>a</sup>  | 3.86 (2.22-4.98) <sup>c</sup>   | 3.28 (2.31-4.46) <sup>a</sup>   | 2.62 (1.72-3.76) <sup>b</sup>  | <.001                       | 2.50 (1.72-3.49)               | 3.32 (2.31-4.14)               | <.01                        |
| L-HDL triglycerides                           | 0.00-0.03 mmol/L    | 0.01 (0.00-0.03) <sup>a</sup>  | 0.03 (0.01-0.05) <sup>b</sup>   | 0.02 (0.01-0.05) <sup>b</sup>   | 0.01 (0.00-0.06) <sup>a</sup>  | <.001                       | 0.01 (0.00-0.06)               | 0.03 (0.01-0.06)               | <.05                        |
| L-LDL cholesterol                             | 0.07-0.68 mmol/L    | 0.31 (0.08-1.03) <sup>a</sup>  | 0.89 (0.14-3.35) <sup>b</sup>   | 0.38 (0.09-1.29) <sup>a</sup>   | 0.26 (0.06-0.72) <sup>a</sup>  | <.001                       | 0.28 (0.16-0.59)               | 0.35 (0.06-1.72)               | >.05                        |
| L-LDL esterified cholesterol                  | 0.03-0.49 mmol/L    | 0.20 (0.02-0.76) <sup>a</sup>  | 0.65 (0.06-2.51) <sup>b</sup>   | 0.27 (0.03-0.97) <sup>a</sup>   | 0.18 (0.02-0.52) <sup>a</sup>  | <.001                       | 0.20 (0.08-0.42)               | 0.24 (0.01-1.27)               | >.05                        |
| L-LDL free cholesterol                        | 0.04-0.20 mmol/L    | 0.11 (0.05-0.27) <sup>a</sup>  | 0.24 (0.04-0.84) <sup>b</sup>   | 0.11 (0.07-0.32) <sup>a</sup>   | 0.09 (0.04-0.20) <sup>a</sup>  | <.001                       | 0.09 (0.06-0.16)               | 0.11 (0.05-0.45)               | >.05                        |
| L-LDL lipids                                  | 0.3-1.2 mmol/L      | 0.7 (0.4-1.6) <sup>a</sup>     | 1.5 (0.5-5.0) <sup>b</sup>      | 0.8 (0.4-1.9) <sup>a</sup>      | 0.5 (0.3-1.3) <sup>a</sup>     | <.001                       | 0.6 (0.3-1.0)                  | 0.7 (0.3-2.6)                  | >.05                        |
| L-LDL particles                               | 0.09-0.37 μmol/L    | 0.22 (0.11-0.54) <sup>ac</sup> | 0.49 (0.13-1.52) <sup>b</sup>   | 0.23 (0.13-0.64) <sup>c</sup>   | 0.17 (0.08-0.39) <sup>a</sup>  | <.001                       | 0.18 (0.11-0.32)               | 0.23 (0.10-0.84)               | >.05                        |
| L-LDL phospholipids                           | 0.08-0.32 mmol/L    | 0.20 (0.10-0.51) <sup>ac</sup> | 0.48 (0.11-1.50) <sup>b</sup>   | 0.21 (0.15-0.59) <sup>c</sup>   | 0.17 (0.08-0.37) <sup>a</sup>  | <.001                       | 0.17 (0.10-0.30)               | 0.23 (0.10-0.82)               | >.05                        |
| L-LDL triglycerides                           | 0.10-0.24 mmol/L    | 0.17 (0.01-0.28)               | 0.16 (0.00-0.31)                | 0.17 (0.05-0.27)                | 0.15 (0.02-0.37)               | >.05                        | 0.15 (0.02-0.37)               | 0.17 (0.08-0.29)               | >.05                        |
| L-VLDL cholesterol                            | 0.00-0.13 mmol/L    | 0.04 (0.00-0.13) <sup>a</sup>  | 0.16 (0.02-0.72) <sup>b</sup>   | 0.09 (0.01-0.22) <sup>b</sup>   | 0.04 (0.01-0.35) <sup>a</sup>  | <.001                       | 0.05 (0.01-0.35)               | 0.09 (0.03-0.35)               | >.05                        |
| L-VLDL esterified cholesterol                 | 0.00-0.06 mmol/L    | 0.02 (0.00-0.08) <sup>a</sup>  | 0.08 (0.01-0.39) <sup>c</sup>   | 0.03 (0.00-0.07) <sup>b</sup>   | 0.02 (0.00-0.09) <sup>ab</sup> | <.001                       | 0.02 (0.00-0.09)               | 0.03 (0.01-0.17)               | >.05                        |
| L-VLDL free cholesterol                       | 0.00-0.08 mmol/L    | 0.02 (0.00-0.06) <sup>a</sup>  | 0.08 (0.02-0.33) <sup>b</sup>   | 0.06 (0.00-0.16) <sup>b</sup>   | 0.02 (0.01-0.26) <sup>a</sup>  | <.001                       | 0.02 (0.01-0.26)               | 0.04 (0.01-0.22)               | >.05                        |
| L-VLDL lipids                                 | 0.0-0.6 mmol/L      | 0.1 (0.0-0.5) <sup>a</sup>     | 0.6 (0.1-2.2) <sup>b</sup>      | 0.4 (0.0-1.0) <sup>b</sup>      | 0.1 (0.0-2.1) <sup>a</sup>     | <.001                       | 0.1 (0.0-2.1)                  | 0.4 (0.0-1.3)                  | >.05                        |
| L-VLDL particles                              | 0.00-0.02 μmol/L    | 0.00 (0.00-0.01) <sup>a</sup>  | 0.02 (0.00-0.06) <sup>b</sup>   | 0.01 (0.00-0.03) <sup>b</sup>   | 0.00 (0.00-0.05) <sup>a</sup>  | <.001                       | 0.00 (0.00-0.05)               | 0.01 (0.00-0.04)               | >.05                        |
| L-VLDL phospholipids                          | 0.00-0.11 mmol/L    | 0.02 (0.00-0.08) <sup>a</sup>  | 0.11 (0.01-0.44) <sup>b</sup>   | 0.07 (0.00-0.22) <sup>b</sup>   | 0.02 (0.00-0.35) <sup>a</sup>  | <.001                       | 0.02 (0.00-0.35)               | 0.05 (0.01-0.30)               | >.05                        |
| L-VLDL triglycerides                          | 0.01-0.42 mmol/L    | 0.04 (0.00-0.29) <sup>a</sup>  | 0.32 (0.04-1.08) <sup>b</sup>   | 0.23 (0.00-0.61) <sup>b</sup>   | 0.04 (0.00-1.37) <sup>a</sup>  | <.001                       | 0.05 (0.00-1.37)               | 0.19 (0.00-0.80)               | >.05                        |
| S-HDL lipids                                  | 1.3-2.2 mmol/L      | 1.5 (1.0-1.9) <sup>a</sup>     | 1.9 (0.8-2.6) <sup>c</sup>      | 1.5 (0.8-2.0) <sup>a</sup>      | 1.2 (0.5-1.9) <sup>b</sup>     | <.001                       | 1.1 (0.5-1.8)                  | 1.6 (0.9-2.0)                  | <.05                        |
| S-HDL cholesterol                             | 0.5-1.0 mmol/L      | 0.6 (0.4-0.8) <sup>a</sup>     | 0.8 (0.3-1.1) <sup>a</sup>      | 0.6 (0.3-0.8) <sup>a</sup>      | 0.5 (0.2-0.8) <sup>b</sup>     | <.001                       | 0.5 (0.2-0.8)                  | 0.7 (0.4-0.9)                  | <.05                        |
| S-HDL esterified cholesterol                  | 0.4-0.8 mmol/L      | 0.5 (0.3-0.7) <sup>a</sup>     | 0.6 (0.2-0.9) <sup>a</sup>      | 0.5 (0.2-0.7) <sup>ab</sup>     | 0.4 (0.1-0.6) <sup>b</sup>     | <.05                        | 0.4 (0.1-0.6)                  | 0.5 (0.3-0.7)                  | <.05                        |
| S-HDL free cholesterol                        | 0.1-0.2 mmol/L      | 0.1 (0.1-0.2) <sup>a</sup>     | 0.2 (0.1-0.2) <sup>c</sup>      | 0.1 (0.1-0.2) <sup>a</sup>      | 0.1 (0.0-0.2) <sup>b</sup>     | <.001                       | 0.1 (0.0-0.1)                  | 0.1 (0.1-0.2)                  | <.01                        |
| S-HDL particles                               | 0.01-0.02 mmol/L    | 0.01 (0.01-0.02) <sup>a</sup>  | 0.02 (0.01-0.02) <sup>c</sup>   | 0.01 (0.01-0.02) <sup>a</sup>   | 0.01 (0.00-0.02) <sup>b</sup>  | <.001                       | 0.01 (0.00-0.02)               | 0.01 (0.01-0.02)               | <.05                        |

| Parameter                                     | Reference interval* | CONT <sup>‡</sup>             | HYPER <sub>U</sub> <sup>‡</sup> | HYPER <sub>T</sub> <sup>‡</sup> | HYPO <sub>U</sub> <sup>‡</sup> | <i>p</i> value <sup>‡</sup> | HYPO <sub>U</sub> <sup>§</sup> | HYPO <sub>T</sub> <sup>§</sup> | <i>p</i> value <sup>§</sup> |
|-----------------------------------------------|---------------------|-------------------------------|---------------------------------|---------------------------------|--------------------------------|-----------------------------|--------------------------------|--------------------------------|-----------------------------|
| <b>Lipoprotein subclasses, median (range)</b> |                     |                               |                                 |                                 |                                |                             |                                |                                |                             |
| S-HDL phospholipids                           | 0.72-1.19 mmol/L    | 0.82 (0.61-1.08) <sup>a</sup> | 1.11 (0.47-1.46) <sup>c</sup>   | 0.86 (0.49-1.24) <sup>a</sup>   | 0.71 (0.33-1.10) <sup>b</sup>  | <.001                       | 0.61 (0.33-1.02)               | 0.89 (0.56-1.14)               | <.05                        |
| S-HDL triglycerides                           | 0.00-0.03 mmol/L    | 0.01 (0.00-0.04) <sup>a</sup> | 0.03 (0.00-0.04) <sup>b</sup>   | 0.03 (0.00-0.07) <sup>bc</sup>  | 0.02 (0.00-0.09) <sup>ac</sup> | <.001                       | 0.02 (0.00-0.09)               | 0.03 (0.00-0.09)               | >.05                        |
| S-LDL cholesterol                             | 0.16-1.53 mmol/L    | 0.67 (0.16-1.74) <sup>a</sup> | 1.60 (0.28-4.38) <sup>c</sup>   | 0.77 (0.10-2.68) <sup>a</sup>   | 0.26 (0.13-1.28) <sup>b</sup>  | <.001                       | 0.27 (0.13-1.28)               | 0.72 (0.16-2.63)               | >.05                        |
| S-LDL esterified cholesterol                  | 0.10-1.09 mmol/L    | 0.48 (0.11-1.26) <sup>a</sup> | 1.14 (0.20-3.19) <sup>c</sup>   | 0.57 (0.09-1.94) <sup>a</sup>   | 0.18 (0.10-0.93) <sup>b</sup>  | <.001                       | 0.20 (0.10-0.92)               | 0.51 (0.11-1.92)               | >.05                        |
| S-LDL free cholesterol                        | 0.05-0.45 mmol/L    | 0.19 (0.06-0.49) <sup>a</sup> | 0.44 (0.08-1.19) <sup>c</sup>   | 0.21 (0.02-0.74) <sup>a</sup>   | 0.07 (0.03-0.37) <sup>b</sup>  | <.001                       | 0.07 (0.04-0.37)               | 0.20 (0.03-0.71)               | >.05                        |
| S-LDL lipids                                  | 0.3-2.4 mmol/L      | 1.1 (0.3-2.8) <sup>a</sup>    | 2.6 (0.5-6.9) <sup>c</sup>      | 1.3 (0.3-4.2) <sup>a</sup>      | 0.4 (0.2-2.1) <sup>b</sup>     | <.001                       | 0.4 (0.2-2.0)                  | 1.2 (0.3-4.2)                  | >.05                        |
| S-LDL particles                               | 0.14-0.96 µmol/L    | 0.45 (0.13-1.12) <sup>a</sup> | 0.97 (0.20-2.69) <sup>c</sup>   | 0.53 (0.15-1.67) <sup>a</sup>   | 0.19 (0.11-0.81) <sup>b</sup>  | <.001                       | 0.20 (0.11-0.79)               | 0.48 (0.13-1.58)               | >.05                        |
| S-LDL phospholipids                           | 0.12-0.84 mmol/L    | 0.42 (0.12-1.01) <sup>a</sup> | 0.91 (0.19-2.49) <sup>c</sup>   | 0.46 (0.10-1.50) <sup>a</sup>   | 0.16 (0.07-0.75) <sup>b</sup>  | <.001                       | 0.16 (0.07-0.71)               | 0.44 (0.10-1.53)               | >.05                        |
| S-LDL triglycerides                           | 0.03-0.07 mmol/L    | 0.05 (0.03-0.08)              | 0.05 (0.00-0.09)                | 0.05 (0.01-0.09)                | 0.04 (0.01-0.14)               | >.05                        | 0.04 (0.01-0.14)               | 0.06 (0.01-0.12)               | >.05                        |
| S-VLDL cholesterol                            | 0.02-0.15 mmol/L    | 0.06 (0.01-0.21) <sup>a</sup> | 0.23 (0.04-1.02) <sup>b</sup>   | 0.08 (0.03-0.18) <sup>a</sup>   | 0.06 (0.03-0.18) <sup>a</sup>  | <.001                       | 0.06 (0.03-0.14)               | 0.08 (0.03-0.46)               | >.05                        |
| S-VLDL esterified cholesterol                 | 0.01-0.09 mmol/L    | 0.04 (0.00-0.15) <sup>a</sup> | 0.15 (0.01-0.76) <sup>b</sup>   | 0.04 (0.00-0.12) <sup>a</sup>   | 0.04 (0.00-0.13) <sup>a</sup>  | <.001                       | 0.04 (0.00-0.08)               | 0.04 (0.00-0.32)               | >.05                        |
| S-VLDL free cholesterol                       | 0.01-0.06 mmol/L    | 0.03 (0.01-0.06) <sup>a</sup> | 0.08 (0.02-0.26) <sup>b</sup>   | 0.04 (0.02-0.09) <sup>b</sup>   | 0.03 (0.01-0.10) <sup>a</sup>  | <.001                       | 0.03 (0.01-0.10)               | 0.04 (0.02-0.14)               | >.05                        |
| S-VLDL lipids                                 | 0.1-0.4 mmol/L      | 0.2 (0.1-0.4) <sup>a</sup>    | 0.5 (0.2-1.8) <sup>b</sup>      | 0.3 (0.1-0.6) <sup>b</sup>      | 0.2 (0.1-0.9) <sup>a</sup>     | <.001                       | 0.2 (0.1-0.9)                  | 0.3 (0.1-1.0)                  | >.05                        |
| S-VLDL particles                              | 0.01-0.04 µmol/L    | 0.03 (0.01-0.05) <sup>a</sup> | 0.06 (0.02-0.19) <sup>b</sup>   | 0.04 (0.02-0.07) <sup>b</sup>   | 0.02 (0.01-0.09) <sup>a</sup>  | <.001                       | 0.02 (0.01-0.09)               | 0.03 (0.01-0.10)               | >.05                        |
| S-VLDL phospholipids                          | 0.01-0.08 mmol/L    | 0.05 (0.02-0.09) <sup>a</sup> | 0.12 (0.03-0.41) <sup>b</sup>   | 0.07 (0.03-0.15) <sup>b</sup>   | 0.04 (0.02-0.17) <sup>a</sup>  | <.001                       | 0.04 (0.02-0.17)               | 0.07 (0.03-0.22)               | >.05                        |
| S-VLDL triglycerides                          | 0.02-0.16 mmol/L    | 0.07 (0.00-0.15) <sup>a</sup> | 0.14 (0.04-0.53) <sup>b</sup>   | 0.13 (0.04-0.27) <sup>b</sup>   | 0.08 (0.00-0.59) <sup>a</sup>  | <.001                       | 0.08 (0.01-0.59)               | 0.12 (0.05-0.41)               | >.05                        |
| XL-HDL cholesterol                            | 0.2-2.8 mmol/L      | 1.6 (0.4-3.4) <sup>a</sup>    | 2.5 (0.8-5.2) <sup>c</sup>      | 1.8 (0.7-4.2) <sup>a</sup>      | 0.6 (0.1-2.3) <sup>b</sup>     | <.001                       | 0.6 (0.1-2.3)                  | 1.8 (0.2-4.6)                  | <.05                        |
| XL-HDL esterified cholesterol                 | 0.2-2.1 mmol/L      | 1.3 (0.3-2.6) <sup>a</sup>    | 1.9 (0.6-4.0) <sup>c</sup>      | 1.4 (0.6-3.2) <sup>a</sup>      | 0.5 (0.0-1.8) <sup>b</sup>     | <.001                       | 0.4 (0.0-1.8)                  | 1.4 (0.1-3.5)                  | <.05                        |
| XL-HDL free cholesterol                       | 0.1-0.6 mmol/L      | 0.4 (0.1-0.8) <sup>a</sup>    | 0.6 (0.1-1.3) <sup>c</sup>      | 0.4 (0.2-1.0) <sup>ac</sup>     | 0.1 (0.0-0.6) <sup>b</sup>     | <.001                       | 0.1 (0.0-0.6)                  | 0.4 (0.0-1.0)                  | <.05                        |
| XL-HDL lipids                                 | 0.6-5.0 mmol/L      | 3.3 (1.0-6.4) <sup>a</sup>    | 5.2 (1.7-9.8) <sup>c</sup>      | 3.4 (1.6-7.7) <sup>a</sup>      | 1.5 (0.3-4.4) <sup>b</sup>     | <.001                       | 1.4 (0.3-4.3)                  | 3.7 (0.5-8.6)                  | <.01                        |
| XL-HDL particles                              | 0.0-5.8 µmol/L      | 4.4 (1.2-8.5) <sup>a</sup>    | 6.5 (2.2-12.0) <sup>c</sup>     | 4.6 (2.2-9.5) <sup>ac</sup>     | 1.9 (0.2-5.9) <sup>b</sup>     | <.001                       | 1.8 (0.2-5.6)                  | 4.5 (0.4-11.2)                 | <.05                        |
| XL-HDL phospholipids                          | 0.33-2.22 mmol/L    | 1.64 (0.57-2.99) <sup>a</sup> | 2.52 (0.96-4.57) <sup>c</sup>   | 1.67 (0.84-3.46) <sup>a</sup>   | 0.80 (0.18-2.19) <sup>b</sup>  | <.001                       | 0.80 (0.18-2.00)               | 1.82 (0.34-3.96)               | <.01                        |
| XL-HDL triglycerides                          | 0.00-0.02 mmol/L    | 0.01 (0.00-0.02) <sup>a</sup> | 0.02 (0.01-0.06) <sup>b</sup>   | 0.02 (0.00-0.04) <sup>b</sup>   | 0.01 (0.00-0.08) <sup>a</sup>  | <.001                       | 0.01 (0.00-0.08)               | 0.02 (0.00-0.05)               | <.05                        |
| XL-VLDL cholesterol                           | 0.00-0.06 mmol/L    | 0.01 (0.00-0.05) <sup>a</sup> | 0.06 (0.01-0.23) <sup>b</sup>   | 0.05 (0.00-0.17) <sup>b</sup>   | 0.01 (0.00-0.30) <sup>a</sup>  | <.001                       | 0.01 (0.00-0.30)               | 0.03 (0.00-0.23)               | >.05                        |
| XL-VLDL esterified cholesterol                | 0.00-0.03 mmol/L    | 0.00 (0.00-0.02) <sup>a</sup> | 0.03 (0.00-0.12) <sup>b</sup>   | 0.02 (0.00-0.06) <sup>b</sup>   | 0.00 (0.00-0.10) <sup>a</sup>  | <.001                       | 0.00 (0.00-0.10)               | 0.01 (0.00-0.08)               | >.05                        |
| XL-VLDL free cholesterol                      | 0.00-0.05 mmol/L    | 0.00 (0.00-0.03) <sup>a</sup> | 0.02 (0.00-0.11) <sup>b</sup>   | 0.03 (0.00-0.12) <sup>b</sup>   | 0.00 (0.00-0.20) <sup>a</sup>  | <.001                       | 0.00 (0.00-0.20)               | 0.01 (0.00-0.15)               | >.05                        |

| Parameter                                     | Reference interval* | CONT‡                            | HYPER <sub>U</sub> ‡             | HYPER <sub>T</sub> ‡             | HYPO <sub>U</sub> ‡              | <i>p</i> value‡ | HYPO <sub>U</sub> § | HYPO <sub>T</sub> § | <i>p</i> value§ |
|-----------------------------------------------|---------------------|----------------------------------|----------------------------------|----------------------------------|----------------------------------|-----------------|---------------------|---------------------|-----------------|
| <b>Lipoprotein subclasses, median (range)</b> |                     |                                  |                                  |                                  |                                  |                 |                     |                     |                 |
| XL-VLDL lipids                                | 0.0-0.3 mmol/L      | 0.0 (0.0-0.2) <sup>a</sup>       | 0.2 (0.0-0.9) <sup>b</sup>       | 0.2 (0.0-0.7) <sup>b</sup>       | 0.0 (0.0-1.6) <sup>a</sup>       | <.001           | 0.0 (0.0-1.6)       | 0.1 (0.0-0.9)       | >.05            |
| XL-VLDL particles                             | 0.000-0.001 µmol/L  | 0.000 (0.000-0.001) <sup>a</sup> | 0.001 (0.000-0.005) <sup>b</sup> | 0.001 (0.000-0.005) <sup>b</sup> | 0.000 (0.000-0.008) <sup>a</sup> | <.001           | 0.000 (0.000-0.008) | 0.001 (0.000-0.005) | >.05            |
| XL-VLDL phospholipids                         | 0.00-0.05 mmol/L    | 0.00 (0.00-0.05) <sup>a</sup>    | 0.03 (0.00-0.16) <sup>b</sup>    | 0.04 (0.00-0.17) <sup>b</sup>    | 0.00 (0.00-0.28) <sup>a</sup>    | <.001           | 0.00 (0.00-0.28)    | 0.02 (0.00-0.21)    | >.05            |
| XL-VLDL triglycerides                         | 0.00-0.17 mmol/L    | 0.01 (0.00-0.13) <sup>a</sup>    | 0.09 (0.00-0.53) <sup>b</sup>    | 0.13 (0.00-0.40) <sup>b</sup>    | 0.01 (0.00-1.03) <sup>a</sup>    | <.001           | 0.01 (0.00-1.03)    | 0.05 (0.00-0.47)    | >.05            |

Note. \*Reference intervals were established in canine serum for dogs of all ages. ‡Groups of unpaired samples (CONT, HYPER<sub>U</sub>, HYPER<sub>T</sub>, HYPO<sub>U</sub>,) were compared by Kruskal-Wallis test adjusted with Bonferroni-correction. The *p*-values are shown in the 7<sup>th</sup> column. Level of significance was set at *p*<.05. Results with different letter superscripts (<sup>a</sup>, <sup>b</sup>, <sup>c</sup>) in the same line are significantly different from each other. §23 paired samples of HYPO<sub>U</sub> and HYPO<sub>T</sub> were compared by Wilcoxon signed-rank test adjusted with Bonferroni-correction. The *p*-values are shown in the final column. Level of significance was set at *p*<.05.

BCAA—branched chain amino acid, CONT—control group, GlycA—glycoprotein acetyls, HYPO<sub>U</sub>—hypoadrenocorticism untreated, HYPO<sub>T</sub>—hypoadrenocorticism treated, HYPER<sub>U</sub>—hyperadrenocorticism untreated, HYPER<sub>T</sub>—hyperadrenocorticism treated, L-HDL—large high-density lipoprotein, L-LDL—large low-density lipoprotein, L-VLDL—large very-low-density lipoprotein, S-HDL—small high-density lipoprotein, S-LDL—small low-density lipoprotein, S-VLDL—small very-low-density lipoprotein, XL-HDL—extra-large high-density lipoprotein, XL-VLDL—extra-large very-low-density lipoprotein.

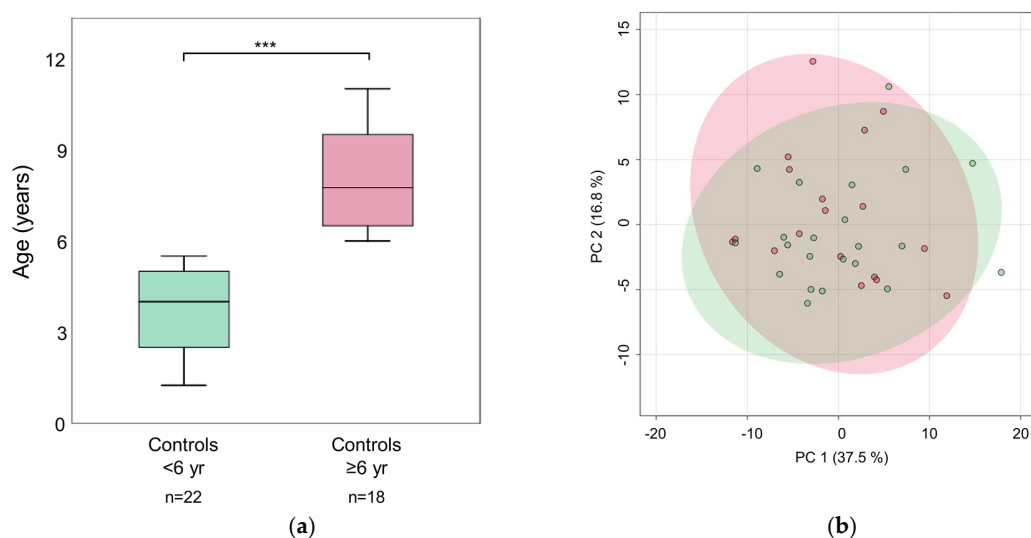

**Supplementary Figure S1** Comparison of age and metabolomics data of CONT groups subdivided at the age of 6 years into dogs of younger (<6 yrs, n=22) and of older age (≥ 6 yrs, n=18). **(a)** Box plot of age of the subdivided CONT groups. Boxes indicate the lower to upper quartile (25th-75th percentile) and median value. Whiskers extend to minimum and maximum values. Line above the boxes reflects significant difference between the groups using a one-way analysis of variance (ANOVA) of both subdivided CONT, HYPER<sub>U</sub>, HYPER<sub>T</sub>, and HYPO<sub>U</sub> groups (\*\**p*<.001). **(b)** Scores plot of principal component analysis (PCA) showing complete overlap between the samples of the younger (<6 yrs, green) and older adult (≥6 yrs, red) control dogs based on the serum metabolomics data. Shaded circles represent 95% confidence intervals, while colored dots illustrate individual samples. The axes are labelled by the first and second principal component (PC 1 and 2, respectively) and percentage of variance of the data explained by that principal component is shown in parentheses. In addition, univariate comparison of metabolomics data with Kruskal Wallis test adjusted by Bonferroni correction of the HYPER<sub>U</sub>, HYPER<sub>T</sub>, HYPO<sub>U</sub>, and both subdivided CONT groups showed no significant differences between the two age-dependent CONT subgroups, and thus the younger and older adult control dogs were combined to one CONT group.

Note: ANOVA — one-way analysis of variance, CONT—control group, HYPO<sub>U</sub>—hypoadrenocorticism untreated, HYPO<sub>T</sub>—hypoadrenocorticism treated, HYPER<sub>U</sub>—hyperadrenocorticism untreated, HYPER<sub>T</sub>—hyperadrenocorticism treated, PCA – principal component analysis, yrs – years.



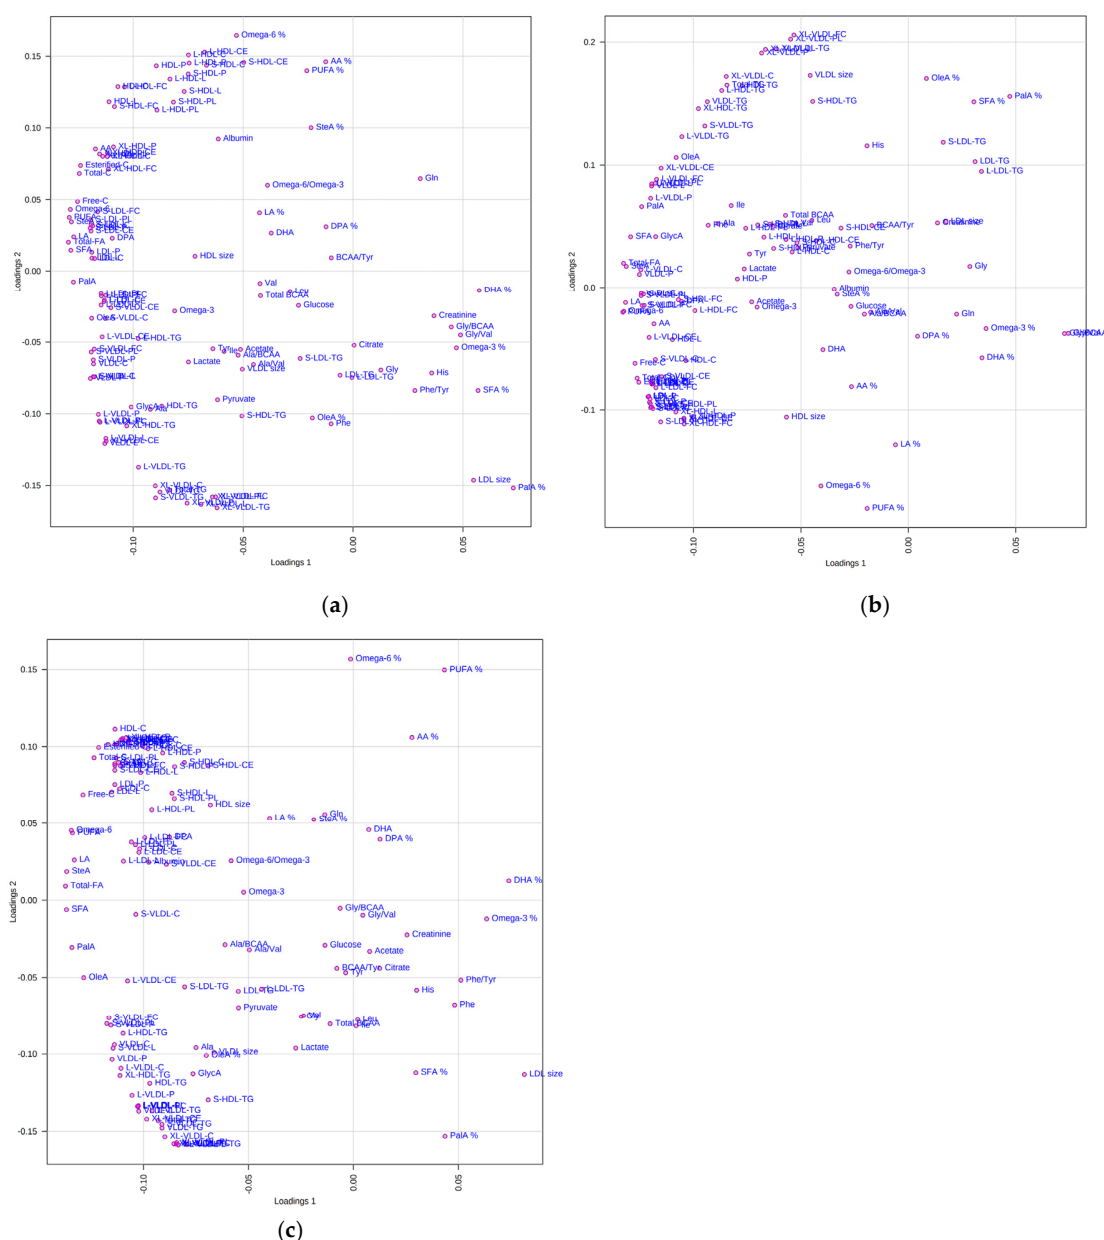

**Supplementary Figure S2** Loadings plot of principal component analysis based on metabolomics data between serum samples (a) of dogs in the groups of CONT (n=40), HYPER<sub>u</sub> (n=27), and HYPO<sub>u</sub> (n=35); (b) HYPER<sub>u</sub> (n=27), HYPER<sub>t</sub> (n=28), and CONT (n=40); (c) HYPO<sub>u</sub> (n=35), HYPO<sub>t</sub> (n=23), and CONT (n=40).

Note. AA—arachidonic acid, Ala—alanine, BCAA—branched chain amino acid, C—cholesterol, CE—esterified cholesterol, CONT—control group, DHA—docosahexaenoic acid, DPA—docosapentaenoic acid, FC—free cholesterol, Gln—glutamine, Gly—glycine, GlycA—glycoprotein acetyls, His—histidine, HYPO<sub>u</sub>—hypoadrenocorticism untreated, HYPO<sub>t</sub>—hypoadrenocorticism treated, HYPER<sub>u</sub>—hyperadrenocorticism untreated, HYPER<sub>t</sub>—hyperadrenocorticism treated, Ile—Isoleucine, LA—linoleic acid, Leu—leucine, L-HDL—large high-density lipoprotein, L-LDL—large low-density lipoprotein, L-VLDL—large very-low-density lipoprotein, OleA—oleic acid, P—particle, PalA—palmitic acid, Phe—phenylalanine, PL—phospholipids, PUFA—polyunsaturated fatty acids, SFA—saturated fatty acids, S-HDL—small high-density lipoprotein, S-LDL—small low-density lipoprotein, SteA—stearic acid, S-VLDL—small very-low-density lipoprotein, TG—triglycerides, Tyr—tyrosine, Val—valine, XL-HDL—extra-large high-density lipoprotein, XL-VLDL—extra-large very-low-density lipoprotein.

Note. AA—arachidonic acid, Ala—alanine, BCAA—branched chain amino acid, C—cholesterol, CE—esterified cholesterol, CONT—control group, DHA—docosahexaenoic acid, DPA—docosapentaenoic acid, FC—free cholesterol, Gln—glutamine, Gly—glycine, GlycA—glycoprotein acetyls, His—histidine, HYPO<sub>U</sub>—hypoadrenocorticism untreated, HYPER<sub>U</sub>—hyperadrenocorticism untreated, Ile—Isoleucine, LA—linoleic acid, Leu—leucine, L-HDL—large high-density lipoprotein, L-LDL—large low-density lipoprotein, L-VLDL—large very-low-density lipoprotein, OleA—oleic acid, P—particle, PalA—palmitic acid, Phe—phenylalanine, PL—phospholipids, PUFA—polyunsaturated fatty acids, SFA—saturated fatty acids, S-HDL—small high-density lipoprotein, S-LDL—small low-density lipoprotein, SteA—stearic acid, S-VLDL—small very-low-density lipoprotein, TG—triglycerides, Tyr—tyrosine, Val—valine, XL-HDL—extra-large high-density lipoprotein, XL-VLDL—extra-large very-low-density lipoprotein.

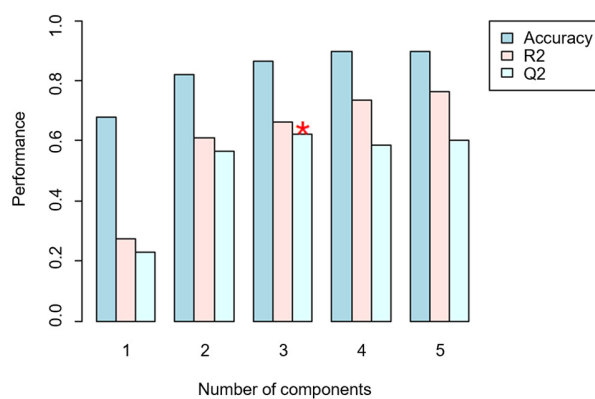

**Supplementary Figure S4** Results of the 10-fold cross-validation of the partial least squares-discriminant analysis (PLS-DA) model based on metabolomics data between serum samples of dogs in the groups of CONT (n=40), HYPER<sub>U</sub> (n=27), and HYPO<sub>U</sub> (n=35) with R<sup>2</sup>, Q<sup>2</sup>, and accuracy measures based on the number of components. Three components were chosen for the model based on the Q<sup>2</sup> criterion.

Note. CONT—control group, HYPO<sub>U</sub>—hypoadrenocorticism untreated, HYPER<sub>U</sub>— hyperadrenocorticism untreated.

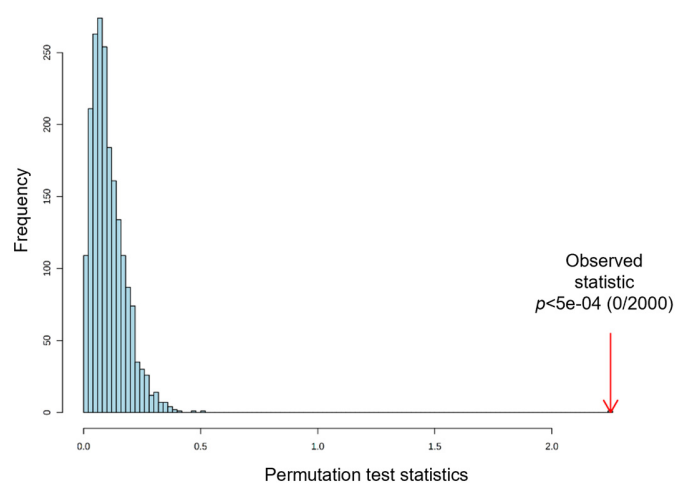

**Supplementary Figure S5** Results of a permutation test with 2,000 permutations for the partial least squares-discriminant analysis (PLS-DA) model based on metabolomics data between serum samples of dogs in the groups of CONT (n=40), HYPER<sub>U</sub> (n=27), and HYPO<sub>U</sub> (n=35). The results that the model is not overfitting the data,  $p < 5e^{-04}$ .

Note. CONT—control group, HYPO<sub>U</sub>—hypoadrenocorticism untreated, HYPER<sub>U</sub>— hyperadrenocorticism untreated.

**Supplementary Table S2** Different machine learning models classifying groups based solely on metabolomics data from serum samples of dogs in the groups of CONT (n=40), HYPER<sub>u</sub> (n=27), and HYPO<sub>u</sub> (n=35); HYPER<sub>u</sub> (n=27), HYPER<sub>t</sub> (n=28), and CONT (n=40); HYPO<sub>u</sub> (n=35), HYPO<sub>t</sub> (n=23), and CONT (n=40).

| Groups                                        | % of correctly classified cases based solely on metabolomics data |        |            |      |               |      |
|-----------------------------------------------|-------------------------------------------------------------------|--------|------------|------|---------------|------|
|                                               | Simple Logistic                                                   | SVM CS | MN N Bayes | MLP  | Random Forest | KNN  |
| CONT, HYPER <sub>u</sub> , HYPO <sub>u</sub>  | 88.2                                                              | 78.4   | 78.4       | 86.3 | 81.4          | 77.5 |
| CONT, HYPER <sub>u</sub> , HYPER <sub>t</sub> | 88.4                                                              | 85.3   | 72.6       | 82.1 | 72.6          | 69.5 |
| CONT, HYPO <sub>u</sub> , HYPO <sub>t</sub>   | 77.6                                                              | 69.4   | 68.4       | 71.4 | 75.5          | 63.3 |

Note. CONT—control group, HYPO<sub>u</sub>—hypoadrenocorticism untreated, HYPO<sub>t</sub>—hypoadrenocorticism treated, HYPER<sub>u</sub>—hyperadrenocorticism untreated, HYPER<sub>t</sub>—hyperadrenocorticism treated, KNN—k-nearest neighbors algorithm, MLP—Multilayer Perceptron Classifier, MN N Bayes—multinomial naïve Bayes, SVM CS—Support Vector Machines - Cramer and Singer.

**Supplementary Equation S1** Equation of simple logistic regression model of the metabolomics data from serum samples of dogs in the groups of CONT (n=40), HYPER<sub>U</sub> (n=27), and HYPO<sub>U</sub> (n=35).

Class CONT:  $20.65 + [\text{SFA \%}] * -0.43 + [\text{Phe}] * -46.03 + [\text{GlycA}] * -2.04$

Class HYPER<sub>U</sub>:  $-5.52 + [\text{SteA}] * 0.9 + [\text{Lactate}] * 0.94$

Class HYPO<sub>U</sub>:  $-0.85 + [\text{HDL-C}] * -0.55 + [\text{His}] * 26.29 + [\text{Phe/Tyr}] * 1.89$

The statistic result for these predictions were (including AUC of the ROC):

|                                  |          |          |
|----------------------------------|----------|----------|
| Correctly Classified Instances   | 90       | 88.2353% |
| Incorrectly Classified Instances | 12       | 11.7647% |
| Kappa statistic                  | 0.8209   |          |
| Mean absolute error              | 0.1342   |          |
| Root mean squared error          | 0.2651   |          |
| Relative absolute error          | 30.5483% |          |
| Root relative squared error      | 56.552%  |          |
| Total Number of Instances        | 102      |          |

Note. CONT—control group, GlycA—glycoprotein acetyls, His—histidine, HYPO<sub>U</sub>—hypoadrenocorticism untreated, HYPER<sub>U</sub>—hyperadrenocorticism untreated, HDL-C—high-density lipoprotein cholesterol, Phe—phenylalanine, SFA—saturated fatty acids, SteA—stearic acid, Tyr—tyrosine.

**Supplementary Table S3** Detailed accuracy by class for the simple logistic regression model of the metabolomics data from serum samples of dogs in the groups of CONT (n=40), HYPER<sub>U</sub> (n=27), and HYPO<sub>U</sub> (n=35).

| Class                   | TP Rate | FP Rate | Precision | Recall | F-Measure | MCC   | ROC Area | PRC Area |
|-------------------------|---------|---------|-----------|--------|-----------|-------|----------|----------|
| CONT                    | 0.950   | 0.113   | 0.844     | 0.950  | 0.894     | 0.823 | 0.935    | 0.814    |
| HYPER <sub>U</sub>      | 0.926   | 0.040   | 0.893     | 0.926  | 0.909     | 0.876 | 0.963    | 0.914    |
| HYPO <sub>U</sub>       | 0.771   | 0.030   | 0.931     | 0.771  | 0.844     | 0.780 | 0.899    | 0.900    |
| <b>Weighted Average</b> | 0.882   | 0.065   | 0.887     | 0.882  | 0.881     | 0.822 | 0.930    | 0.870    |

Note. CONT—control group, HYPO<sub>U</sub>—hypoadrenocorticism untreated, HYPER<sub>U</sub>—hyperadrenocorticism untreated.
